# Supplementary material for: Remdesivir-bound and ligand-free simulations reveal the probable mechanism of inhibiting the RNA dependent RNA polymerase of severe acute respiratory syndrome coronavirus 2
Source: PubMed Central journal article supplement (PMC9055499; doi:10.1039/d0ra04743k), 2020-07-17

**Supplementary data for “Remdesivir-bound and ligand-free simulations reveal the probable mechanism of inhibiting the RNA dependent RNA polymerase of Severe Acute**

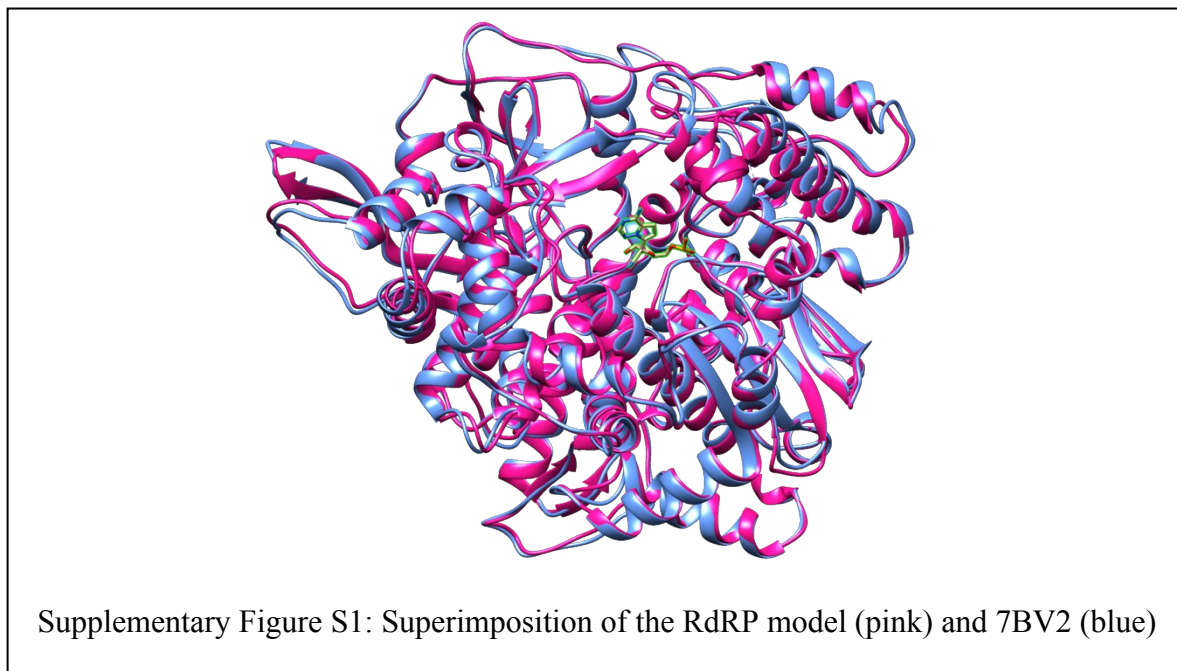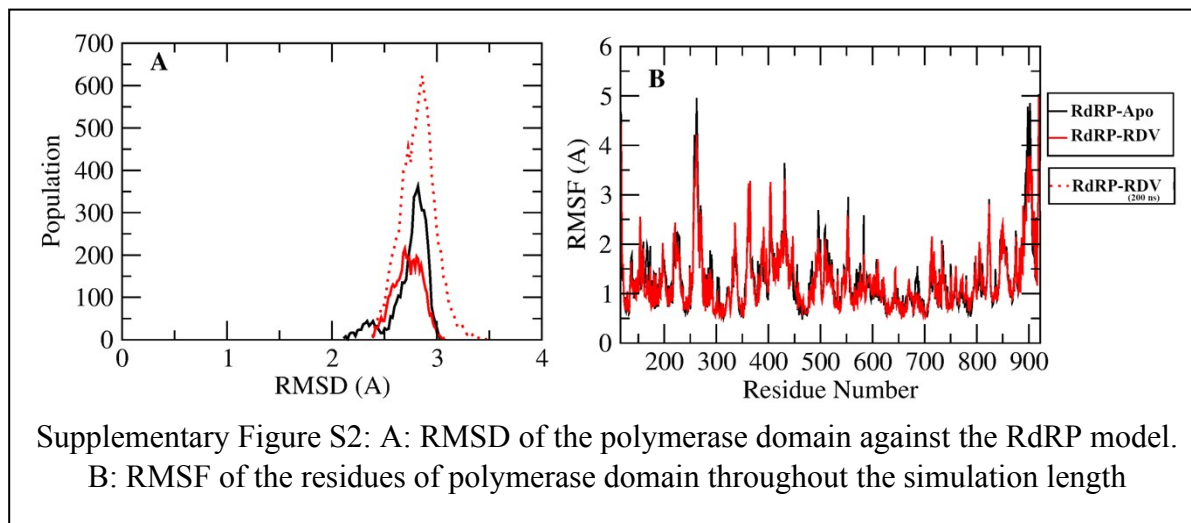

**Respiratory Syndrome Coronavirus 2”**

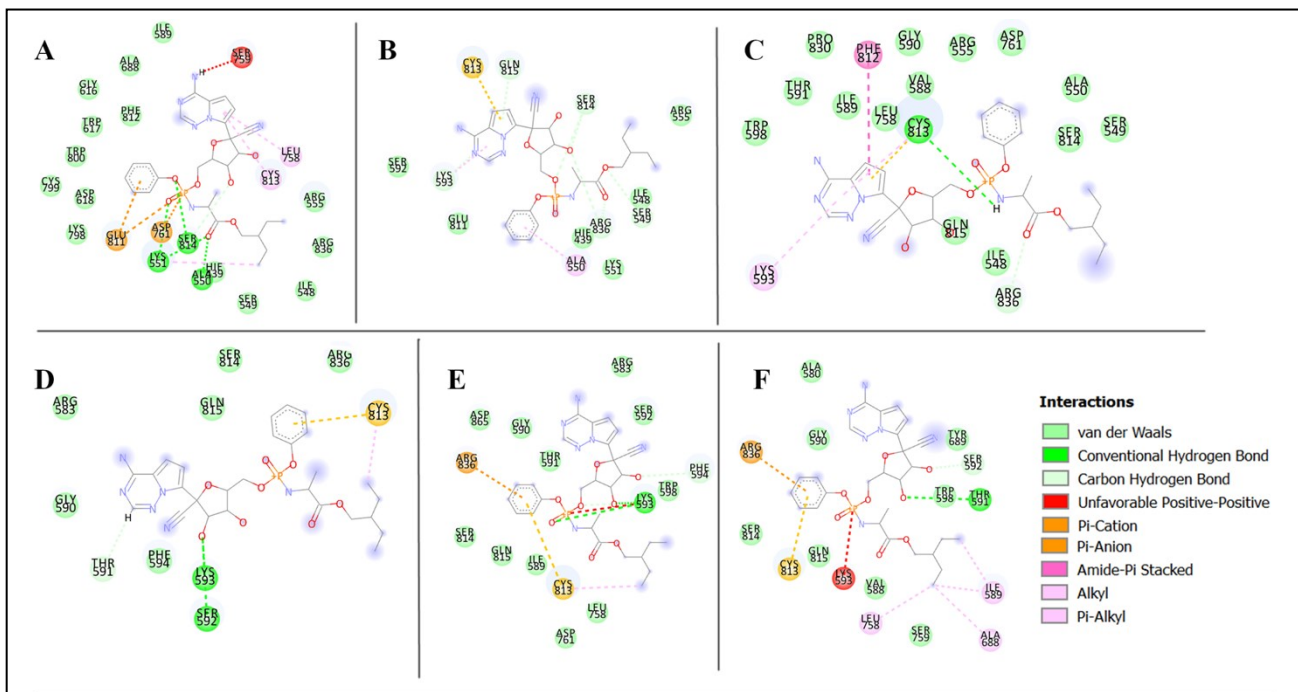

Figure S3: Interactions between RDV and RdRP for run1 of the RdRP-RDV system simulations. The interactions at (A) 0<sup>th</sup>ns, (B) 10<sup>th</sup>ns, (C) 20<sup>th</sup>ns, (D) 30<sup>th</sup>ns, (E) 40<sup>th</sup>ns and (F) 50<sup>th</sup>ns

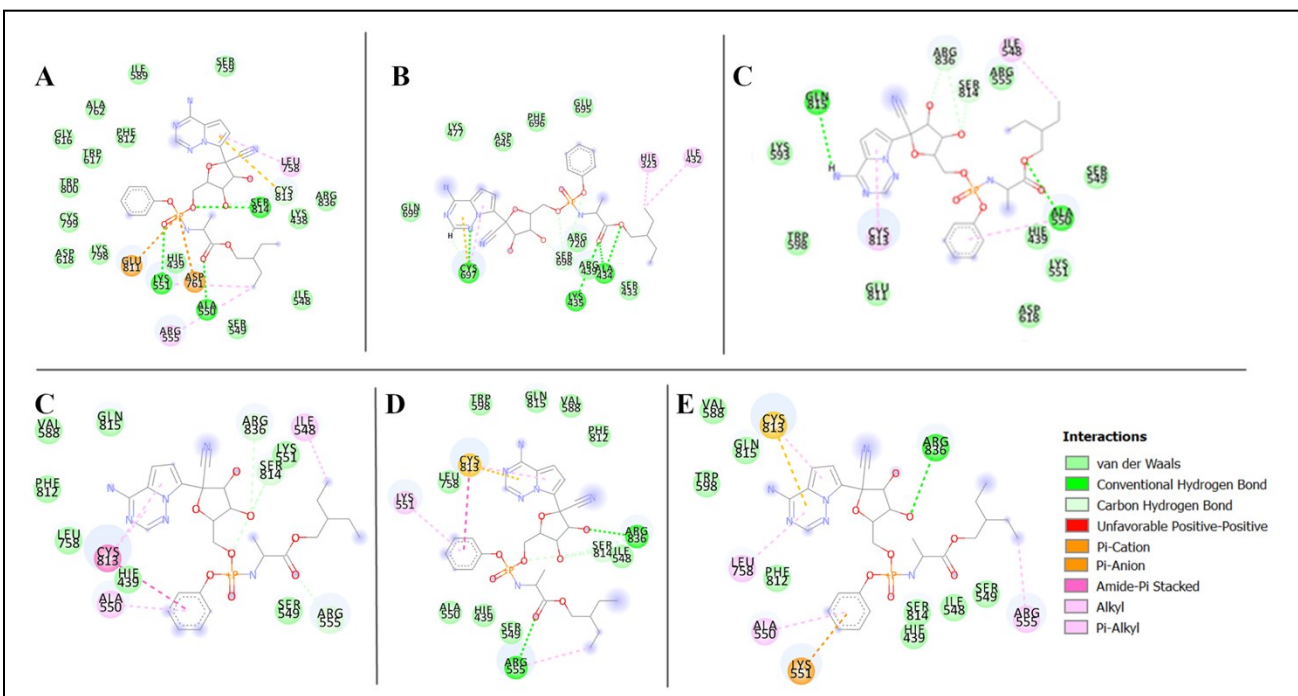

Figure S4: Interactions between RDV and RdRP for run2 of the RdRP-RDV system simulations. The interactions at (A) 0<sup>th</sup>ns, (B) 10<sup>th</sup>ns, (C) 20<sup>th</sup>ns, (D) 30<sup>th</sup>ns, (E) 40<sup>th</sup>ns and (F) 50<sup>th</sup>ns

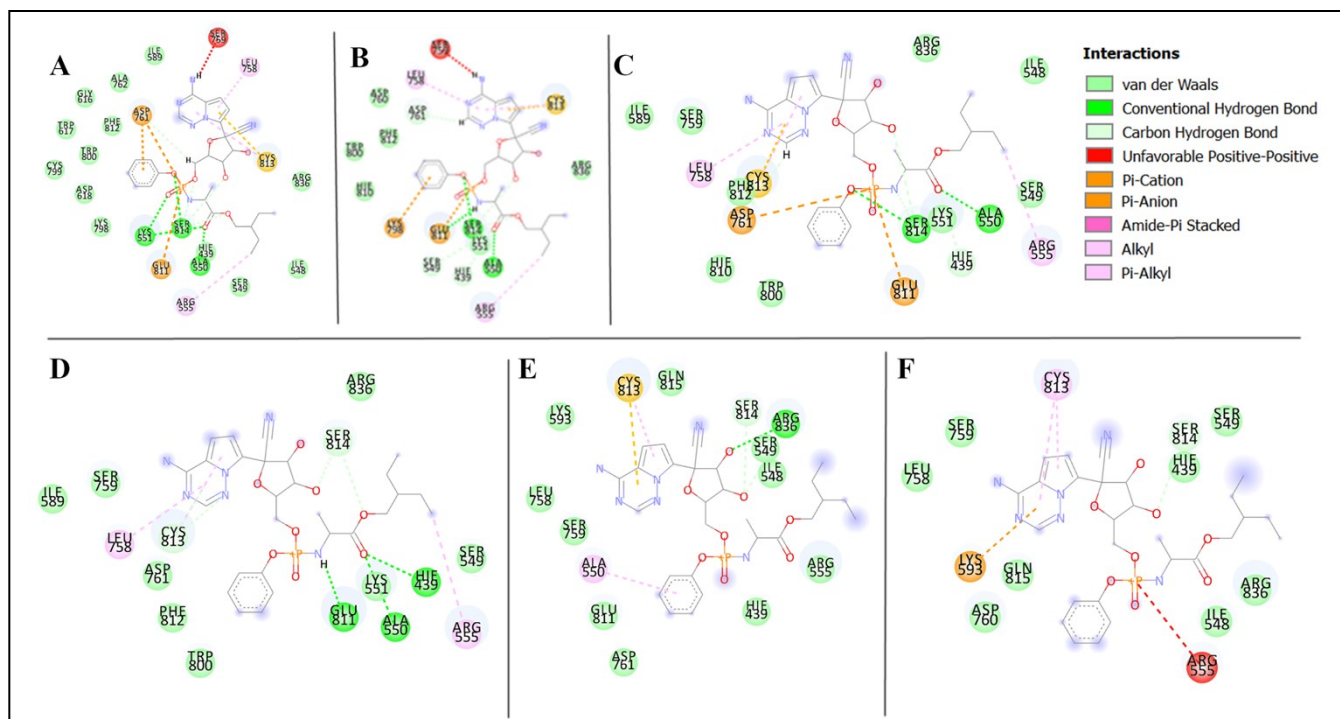

Figure S5: Interactions between RDV and RdRP for run3 of the RdRP-RDV system simulations. The interactions at (A) 0<sup>th</sup>ns, (B) 10<sup>th</sup>ns, (C) 20<sup>th</sup>ns, (D) 30<sup>th</sup>ns, (E) 40<sup>th</sup>ns and (F) 50<sup>th</sup>ns

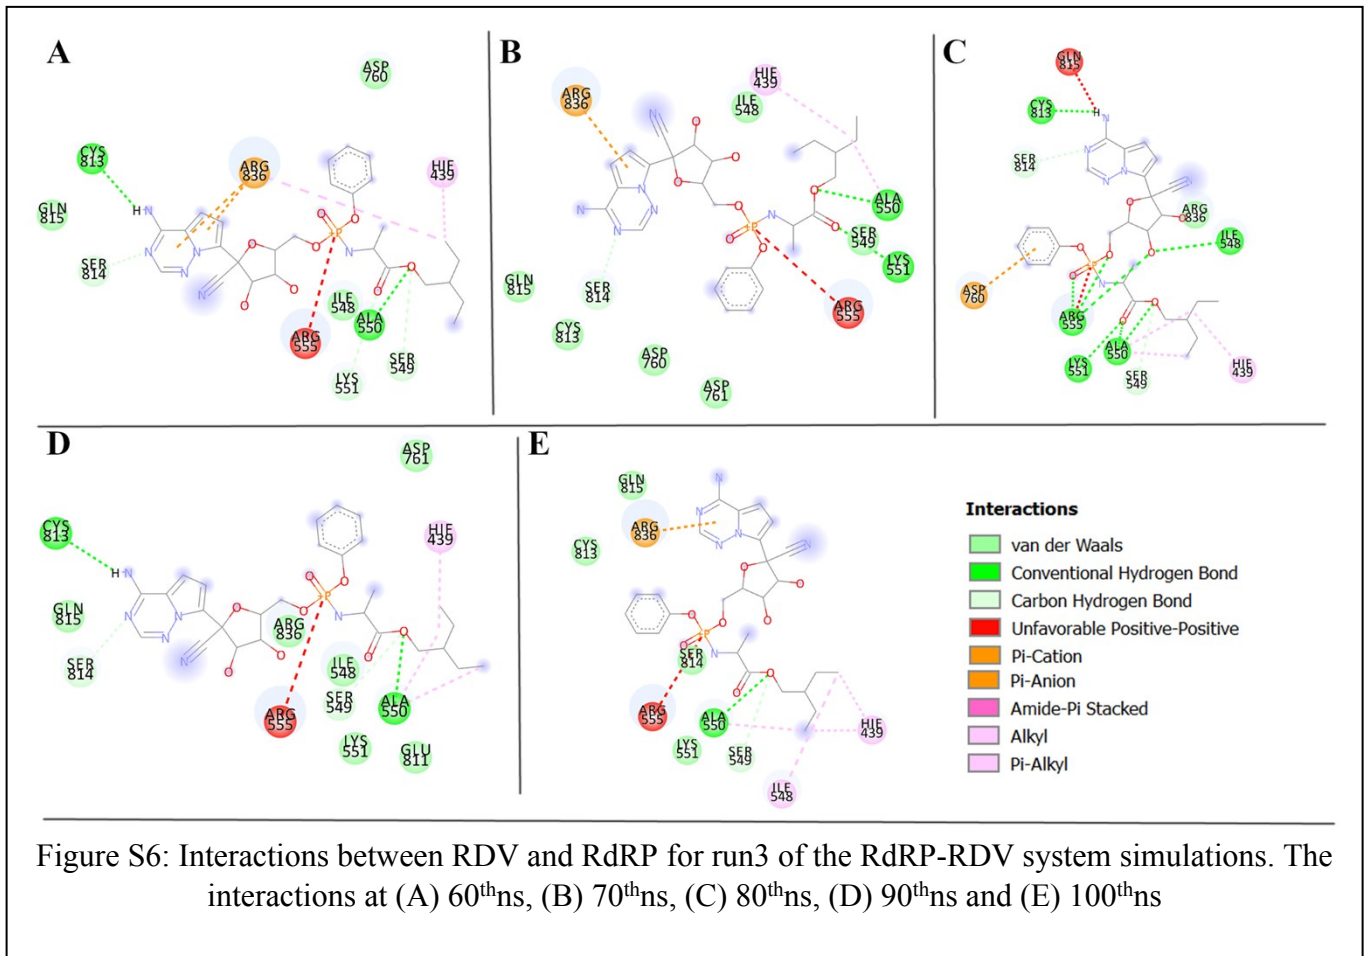

Supplement: RA-010-D0RA04743K-s001.pdf [file RA-010-D0RA04743K-s001.pdf]
